# Supplementary material
Source: publisher figshare collection journal article supplement (https://acs.figshare.com/ndownloader/files/4616572)
Supplement: Supplementary file 1 [file 4616572]

# Fluorescent Conjugated Polyelectrolyte As An Indicator for Convenient Detection of DNA Methylation

Fude Feng<sup>1</sup>, Hongzhong Wang<sup>2</sup>, Lingli Han<sup>2</sup>, Shu Wang<sup>1\*</sup>

<sup>1</sup>Beijing National Laboratory for Molecular Sciences, Key Laboratory of Organic Solids, Institute of Chemistry, Chinese Academy of Sciences, Beijing 100080, P. R. China.

Email: wangshu@iccas.ac.cn

<sup>2</sup> Department of Biological Sciences and Biotechnology, Tsinghua University, Beijing 100084, P. R. China.

## Supporting Information

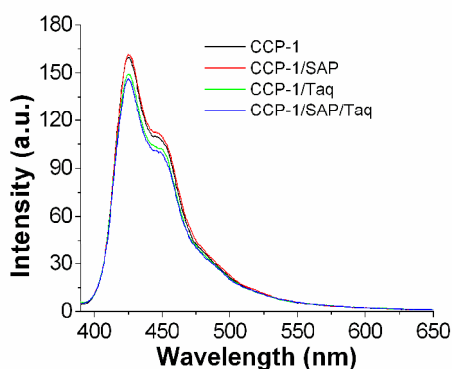

**Figure S1.** Fluorescence spectra from Hepes buffer solutions (25 mM, pH 8.0) containing (a) CCP-1 (0.25  $\mu$ M), (b) CCP-1 (0.25  $\mu$ M), SAP (0.17 U/mL), (c) CCP-1 (0.25  $\mu$ M), Taq (0.21 U/mL), (d) CCP-1 (0.25  $\mu$ M), SAP (0.17 U/mL) and Taq (0.21 U/mL). The excitation wavelength was 380 nm.

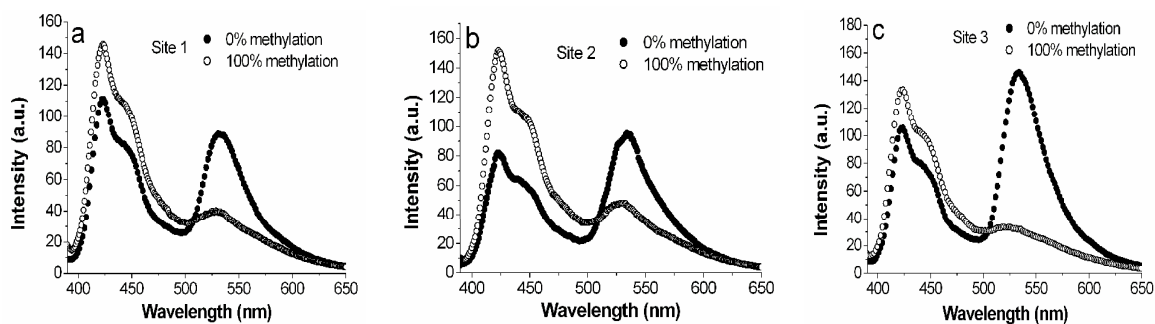

**Figure S2.** Fluorescence spectra (a-c) from solutions containing CCP-1 and single nucleotide base extension products of methylated plasmid and unmethylated plasmid using unmethylation-specific probes in 1 mL of HEPES buffer solution (25 mM, pH 8). The probes

used in extension reactions were p16-1n for site 1, p16-2n for site 2 and p16-3n for site 3. The amount: 0.67 pmol probe, 1.67 pmol dGTP-Fl, [CCP-1] = 0.25  $\mu$ M in RUs. The excitation wavelength is 380 nm.

```

1 attcaagagc taacaggtat tagcttagga tgtgtggcac tgttcttaag gcttatatgt
61 attatacat catttaaac cacaacaacc cctataaagc agggggcact catattccct
121 tccccctta taattacgaa aaatgcaagg tattttcagt aggaaagaga aatgtagaa
181 gtgtgaagga gacaggacag tatttgaagc tggcttttgg atcactgtgc aactctgctt
241 ctagaacact gagcactttt tctggtctag gaattatgac tttgagaatg gagtccgtcc
301 ttccaatgac tccctcccca ttttcctatc tgcctacagg cagaattctc ccccgctcgt
361 attaaataaa cctcatcttt tcagagtctg ctcttatacc aggcaatgta cactctgag
421 aaaccttgc cccagacagc cgttttacac gcaggagggg aaggggaggg gaaggagaga
481 gcagtccgac tctccaaaag gaatcctttg aactagggtt tctgacttag tgaaccccgc
541 gctcctgaaa atcaagggtt gaggggtag ggggacactt tcttagtcgt acaggtgatt
601 tcgatttctc ggtggggctc tcacaactag gaaagaatag ttttgctttt tcttaigatt
661 aaaagaagaa gccatacttt ccctatgaca ccaaaccacc cgattcaatt tggcagttag
721 gaaggttgta tcgcgggagga aggaacggg gcggggggcgg atttctttt aacagagtga
781 acgcactcaa acacgccttt gctggcaggc gggggagcgc ggctgggagc agggaggccg
841 gagggcggtg tgggggagc gtggggagga gcccagtcct ccttccttgc caacgctggc
901 tctggcgagg gctgcttccg gctggtgccc ccgggggaga cccaacctgg ggcgacttca
961 ggggtgccac attCGctaag tgcctggagt taatagcacc tctccgagc actgctcac
1021 agcgtccctt tgcctggaaa gatacCGcgg tccctccaga ggatttgagg gacagggtCG
1081 gagggggctc ttccgccagc accggaggaa gaaagaggag gggctggctg gtcaccagag
1141 ggtggggcgg accgagtgcg ctgcgggct gcggagaggg gtagagcagg cagcgggcgg
1201 cggggagcag catggagccg gcggcgggga gcagcatgga gccttcggt gactggctgg
1261 ccacggccgc gg

```

Site 2

Site 1, 3

**Scheme-S1.** The sequence of the *p16* promoter region of human colon cancer cell line HT29 containing the three methylated CpG sites and the positions of first and second rounds of PCR.

### Completed Reference 14 in the text

Bibikova, M.; Lin, Z.; Zhou, L.; Chudin, E.; Garcia, E. W.; Wu, B.; Doucet, D.; Thomas, N. J.; Wang, Y.; Vollmer, E.; Goldmann, T.; Seifart, C.; Jiang, W.; Barker, D. L.; Chee, M. S.; Floros, J.; Fan, J.-B. *Genome Res.* **2006**, *16*, 383.
